# Supplementary material for: A novel copper-based nanozyme: fabrication and application for colorimetric detection of resveratrol
Source: Royal Society of Chemistry journal article supplement (doi:10.1039/d3ay01666h), 2023-01-01
Supplement: d3ay01666h1.pdf [file d3ay01666h1.pdf]

**Supporting Information**

**A novel copper-based nanozyme: fabrication and application for colorimetric  
detection of resveratrol**

Wanxin Li<sup>a</sup>, Jiaxin Sun<sup>a</sup>, Yao Xin<sup>a</sup>, Yu Han<sup>a</sup>, Yanyang Sun<sup>a</sup>, Aijun Li<sup>b,\*</sup>, Zhi Wang<sup>b,\*</sup>

<sup>a</sup> Key Laboratory of Molecular Enzymology and Engineering of Ministry of Education, College of life science, Jilin University, Changchun 130023, P. R. China; Tel.: +86-431-8515-5247;

<sup>b</sup> College of Physics, Jilin University, Changchun 130033, P. R. China; Fax: +86-431-8515-5243.

Corresponding author: ✉ Aijun Li, laj@jlu.edu.cn; ✉ Zhi Wang, wangzhi@jlu.edu.cn

## CONTENT

**Fig. S1.** Original SEM photo of the simple copper phosphate

**Fig. S2.** The catalytic activity of urea@Cu-NF with varying (a) H<sub>2</sub>O<sub>2</sub> concentration, (b) TMB concentration, (c) temperature, (d) pH and (e) reaction time

**Fig. S3.** Element mapping images of urea@Cu-NF

**Fig. S4.** (a) HPLC chromatograms of a resveratrol standard solution, containing 45 μM, and (b) linearity plot of resveratrol

**Fig. S5.** HPLC chromatograms of actual samples spiked with 10 μM, 15 μM and 20 μM standard solutions of resveratrol

**Fig. S6.** SEM image of urea@Cu-NF after 8th reaction round

**Fig. S7.** SEM image of urea@Cu-NF after 28 days storage

**Table S1.** Kinetic parameters of urea@Cu-NF and comparison with other reported nanozymes

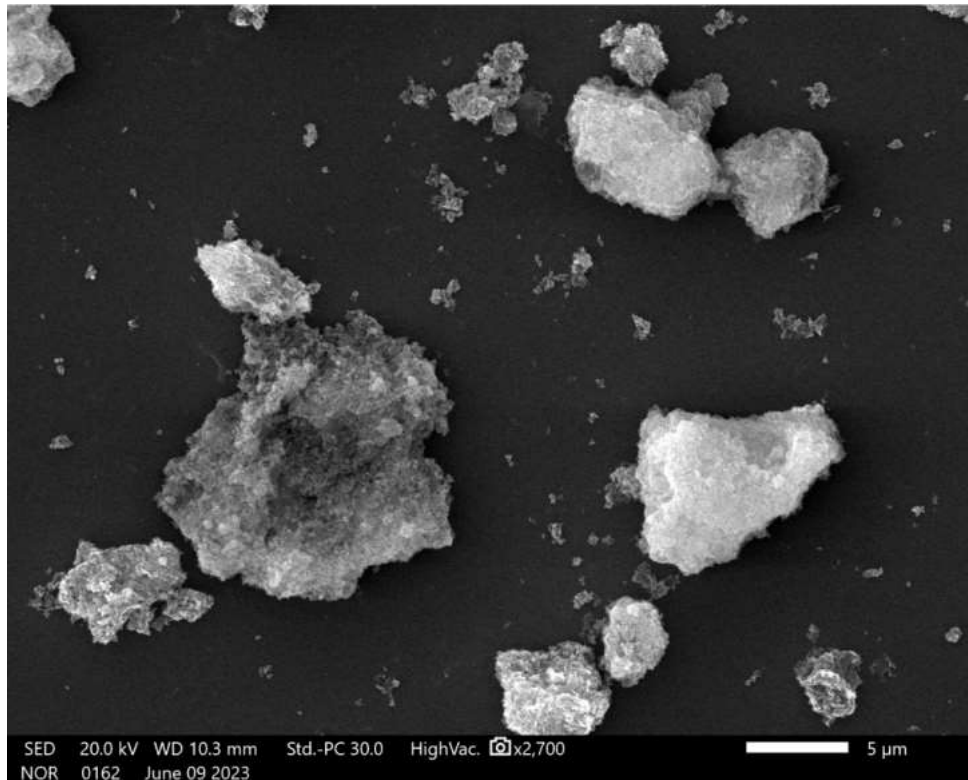

**Fig S1. Original SEM photo of the simple copper phosphate**

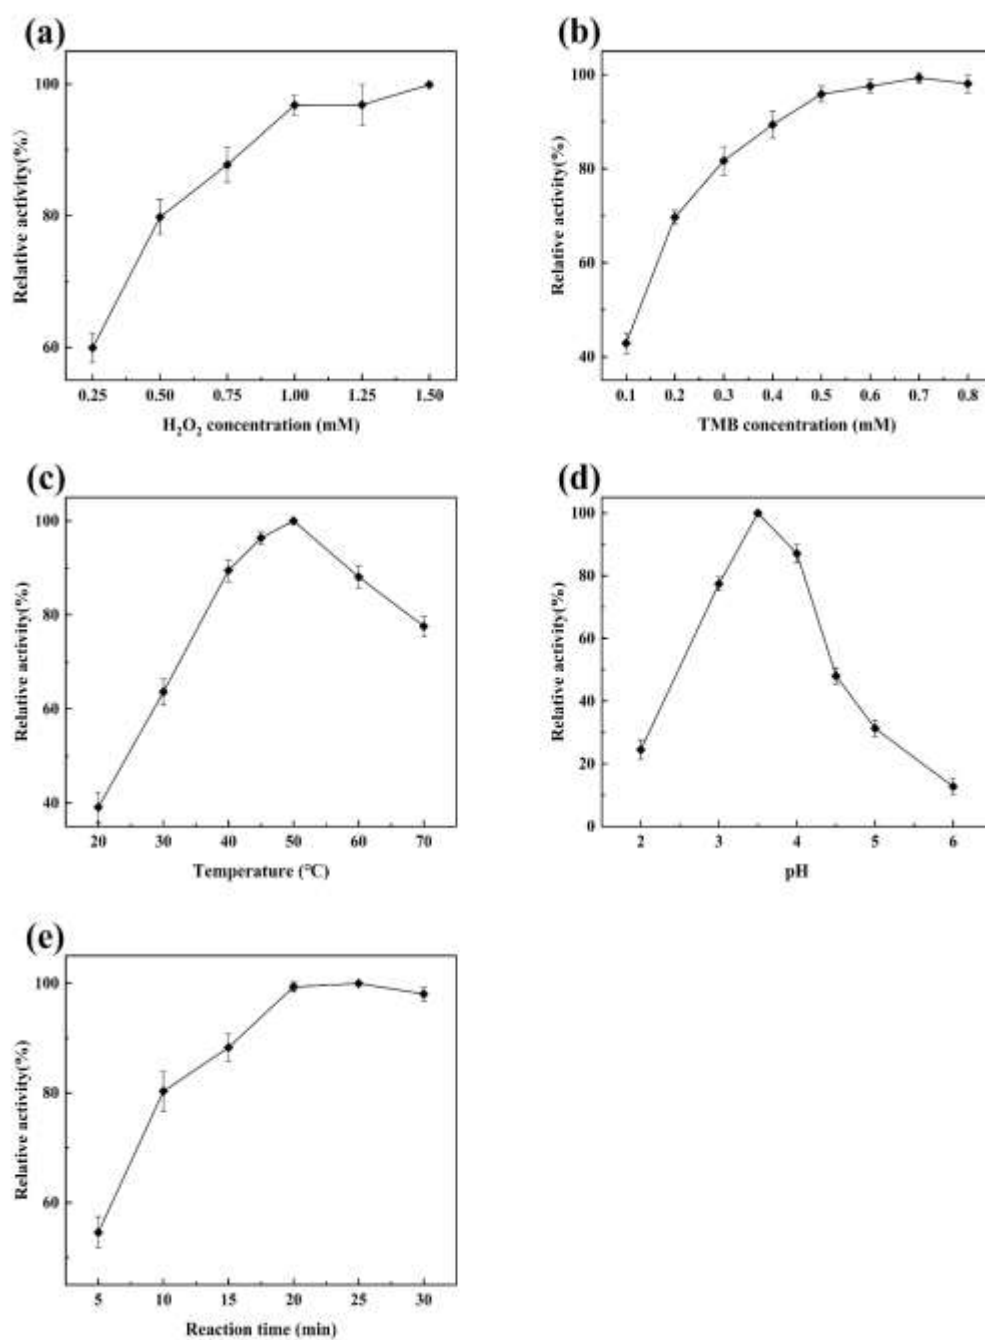

Figure S2. The catalytic activity of urea@Cu-NF with varying (a) H<sub>2</sub>O<sub>2</sub> concentration, (b) TMB concentration, (c) temperature, (d) pH and (e) reaction time.

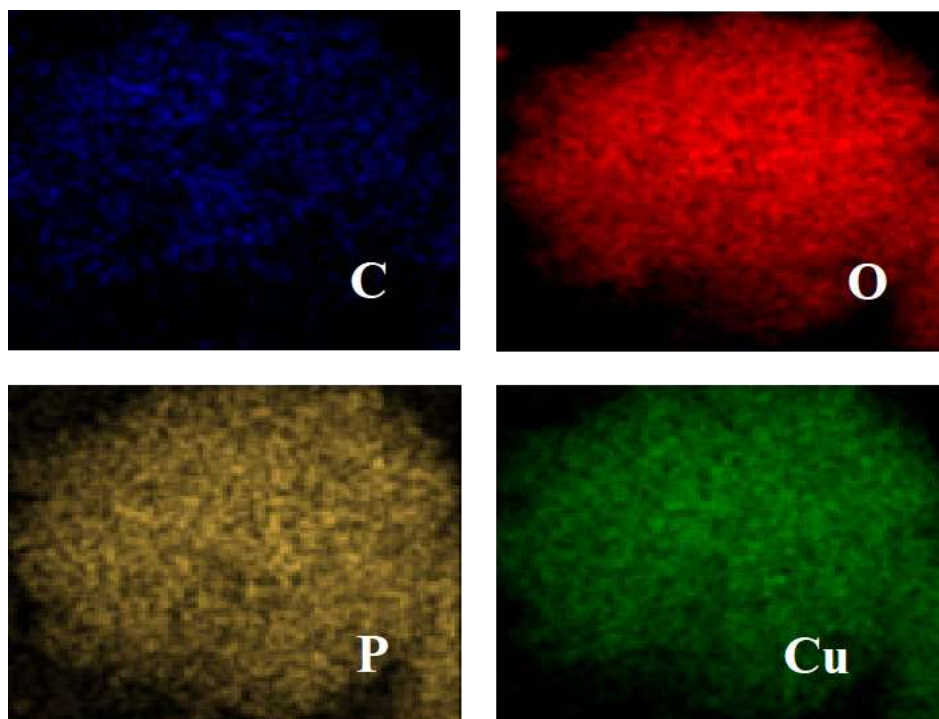

Figure S3. Element mapping images of urea@Cu-NF

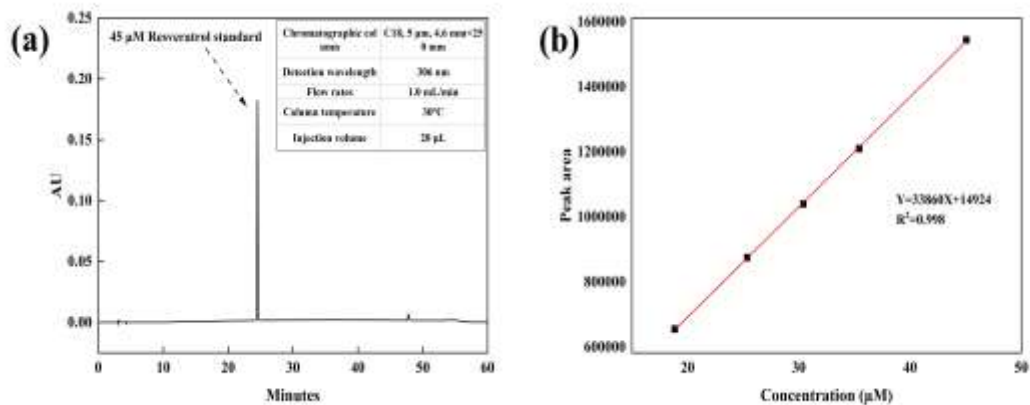

Figure S4. (a) HPLC chromatograms of a resveratrol standard solution, containing 45  $\mu\text{M}$ , and (b) linearity plot of resveratrol

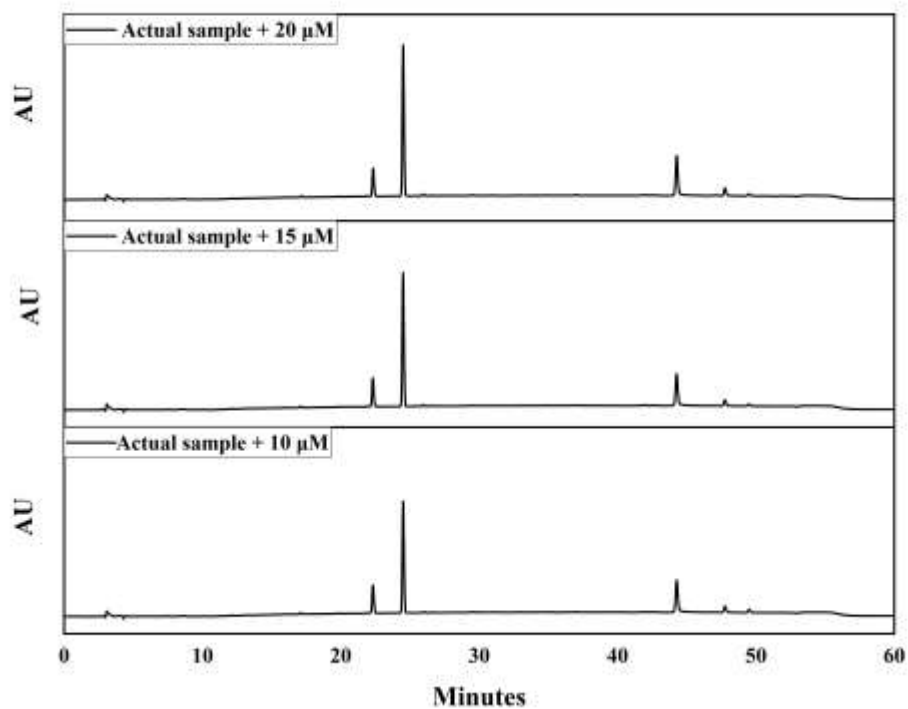

Figure S5. HPLC chromatograms of actual samples spiked with 10  $\mu\text{M}$ , 15  $\mu\text{M}$  and 20  $\mu\text{M}$  standard solutions of resveratrol

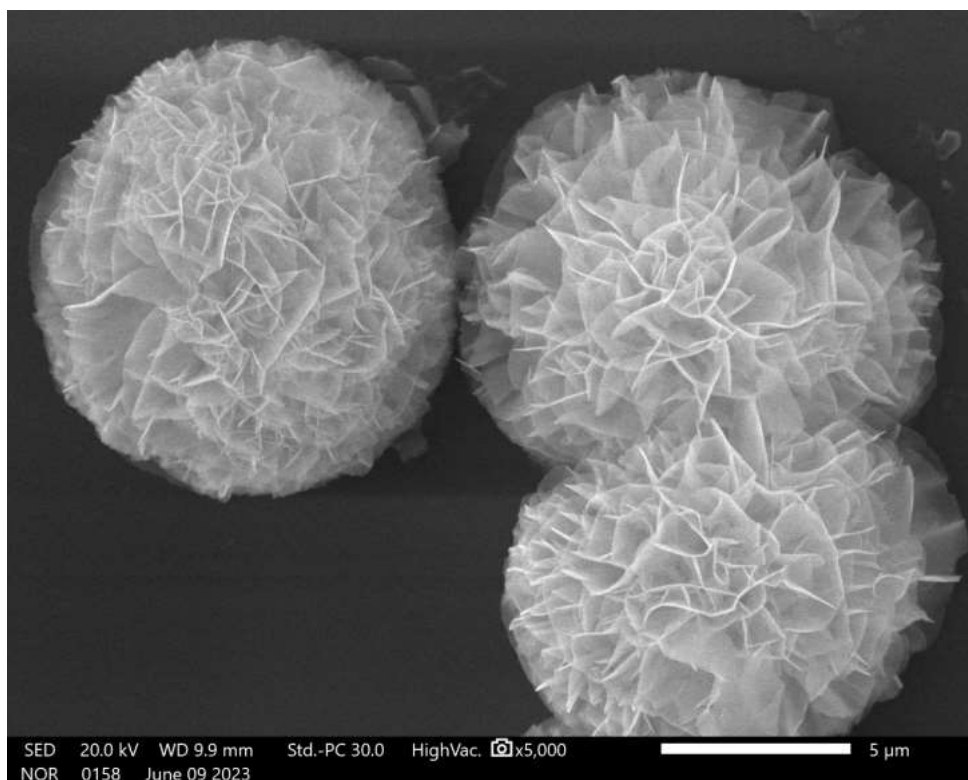

**Fig. S6. SEM image of urea@Cu-NF after 8th reaction round**

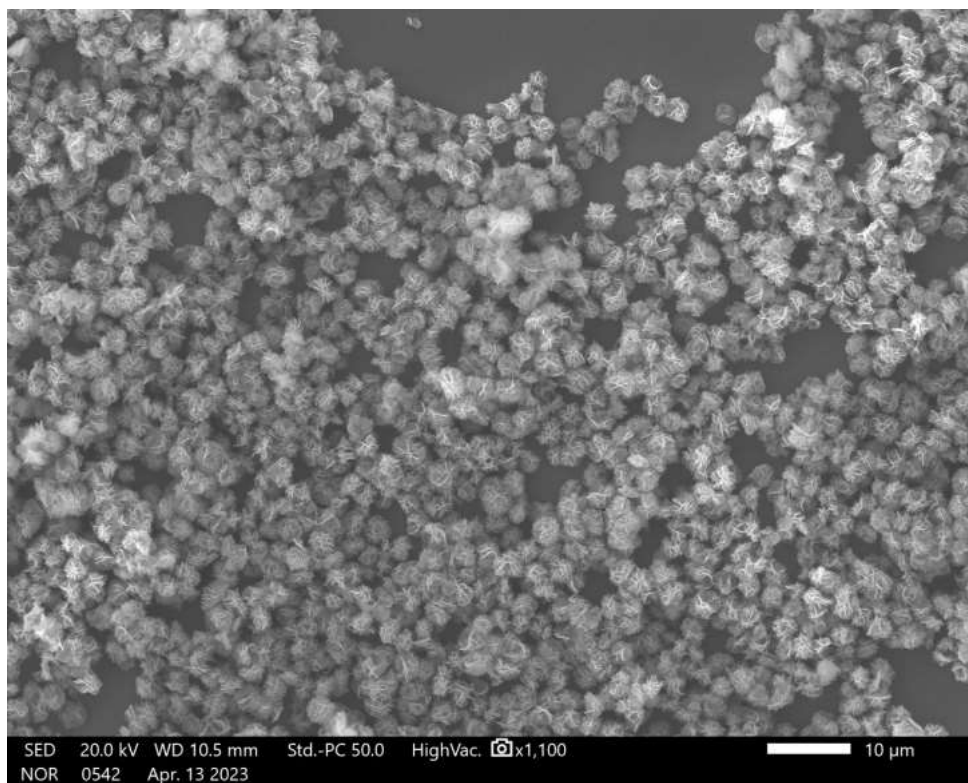

**Figure S7. SEM image of urea@Cu-NF after 28 days storage**



**Table S1. Kinetic parameters of urea@Cu-NF and comparison with other reported nanozymes**

| Catalyst                                        | Structure         | Substrate                     | $K_m$ (mM) | $V_{max}$<br>( $10^{-8}$ M/S) | Reference |
|-------------------------------------------------|-------------------|-------------------------------|------------|-------------------------------|-----------|
| WO <sub>3</sub> nanoparticle                    | nanosheet         | H <sub>2</sub> O <sub>2</sub> | 1260       | 3                             | 1         |
|                                                 |                   | TMB                           | 10.6       | 1.53                          |           |
| Ag@Fe <sub>3</sub> O <sub>4</sub> nanowire      | nanowire          | H <sub>2</sub> O <sub>2</sub> | 75.2       | 2.288                         | 2         |
|                                                 |                   | TMB                           | 3.46       | 2.288                         |           |
| GBR                                             | flat film         | H <sub>2</sub> O <sub>2</sub> | 10.98      | 3.60                          | 3         |
|                                                 |                   | TMB                           | 0.83       | 0.68                          |           |
| Au/Cu <sub>2</sub> O nanocubes                  | nanocube          | H <sub>2</sub> O <sub>2</sub> | 10.56      | 6.68                          | 4         |
|                                                 |                   | TMB                           | 0.21       | 6.08                          |           |
| Ce/ZnCo <sub>2</sub> O <sub>4</sub> nanospheres | nanosphere        | H <sub>2</sub> O <sub>2</sub> | 0.553      | 2.618                         | 5         |
|                                                 |                   | TMB                           | 0.0886     | 18.796                        |           |
| UO <sub>2</sub> hollow nanospheres              | hollow nanosphere | H <sub>2</sub> O <sub>2</sub> | 6.423      | 0.584                         | 6         |
|                                                 |                   | TMB                           | 0.549      | 0.629                         |           |
| Urea@Cu-NF                                      | nanoflower        | H <sub>2</sub> O <sub>2</sub> | 3.82       | 13.29                         | This work |
|                                                 |                   | TMB                           | 0.503      | 6.09                          |           |

## References

1. Z. Li, X. Liu, X.-H. Liang, J. Zhong, L. Guo and F. Fu, *Talanta*, 2019, **204**, 278-284.
2. J. Chen, Y. Liu, G. Zhu and A. Yuan, *Cryst. Res. Technol.*, 2014, **49**, 309-314.
3. S. Singh, K. Mitra, R. Singh, A. Kumari, S. K. S. Gupta, N. Misra, P. Maiti and B. Ray, *Anal. Methods*, 2017, **9**, 6675-6681.
4. A. Jiao, L. Xu, Y. Tian, Q. Cui, X. Liu and M. Chen, *Talanta*, 2021, **225**, 121990.
5. D. Yin, H. Yang, S. Wang, Z. Yang, Q. Liu, X. Zhang and X. Zhang, *Colloids Surf., A*, 2020, **607**, 125466.
6. Z. Yang, Y. Liu, Y. Liu, Y. Wang, H. Rao, Y. Liu, J. Yin, G. Yue, C. Wu and H. Li, *Microchim. Acta*, 2019, **186**, 1-8.
